# Supplementary material
Source: Springer Nature journal article supplement (https://www.springermedizin.de/resource/supplementary/12939_2012_355_MOESM5_ESM.pdf/9550966)

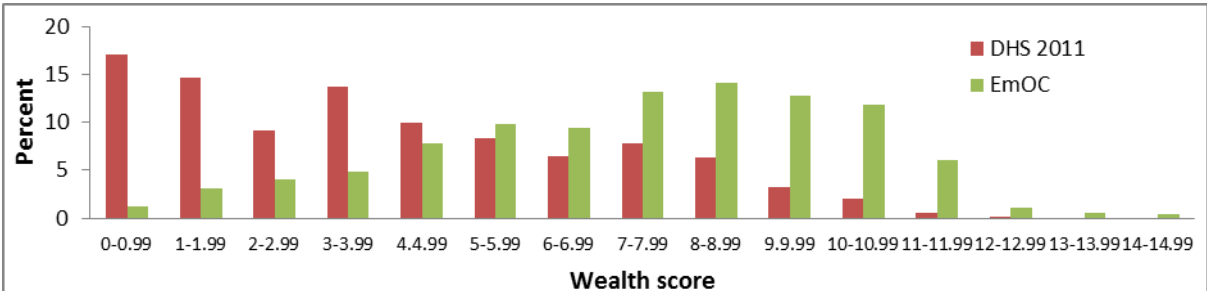

Supplement: MOESM5 [file 9550966]
